# Supplementary material
Source: Copernicus journal article supplement (doi:10.5194/egusphere-2026-2217)
Supplement: Supplementary file 1 [file egusphere-2026-2217-supplement.pdf]

## Supplement

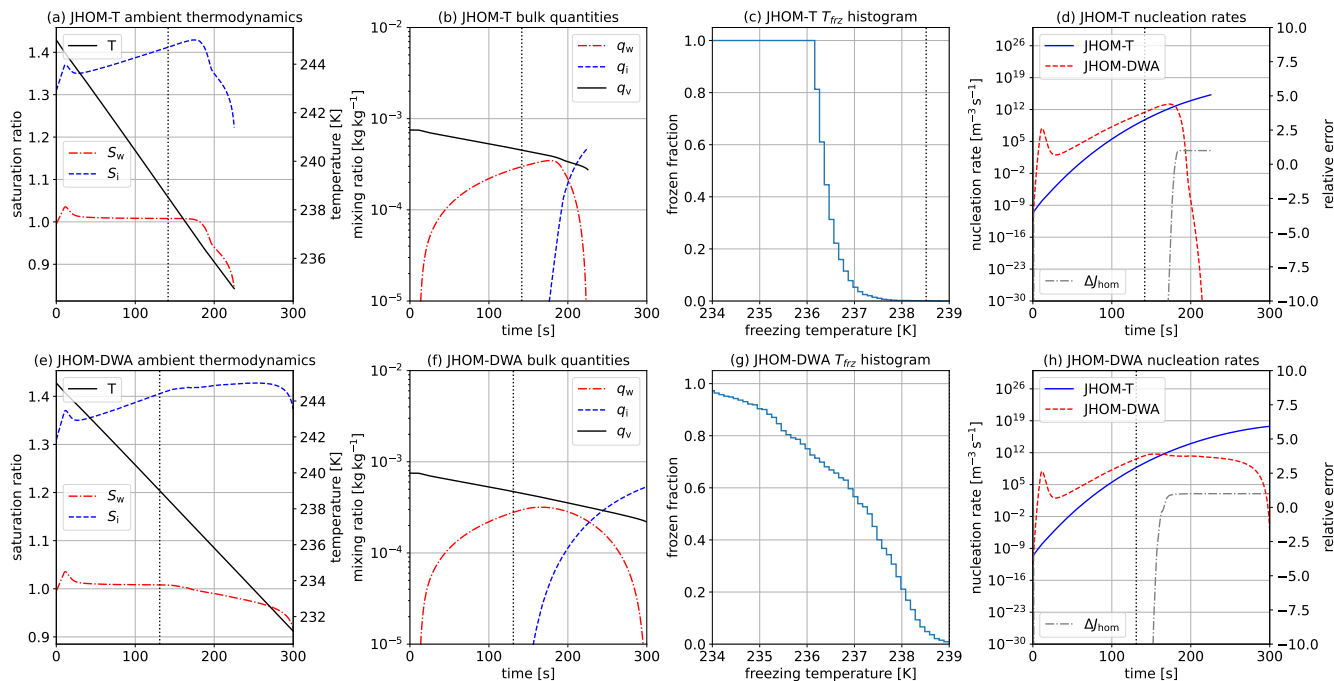

**Figure S1.** Air parcel ascent simulations with vapour deposition on ice active using JHOM-T (a–d) and JHOM-DWA (e–h) homogeneous nucleation rate formulations, showing (a, e) ambient temperature  $T$  and saturation ratios  $S_w$  and  $S_i$ , (b, f) bulk quantities, (c, g) freezing temperature histograms, and (d, h) nucleation rates. The dashed line indicates the first freezing event.

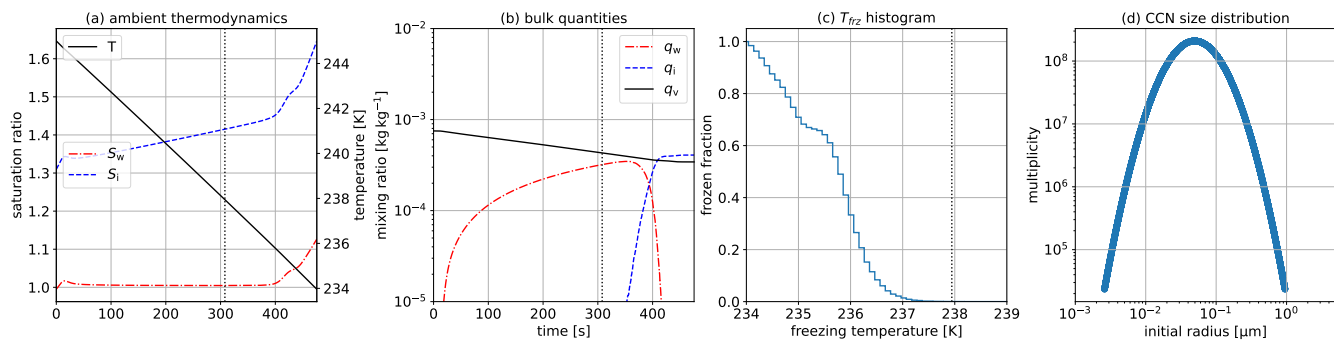

**Figure S2.** Air parcel ascent simulations for a lognormal CCN spectrum showing (a) ambient temperature  $T$  and saturation ratios  $S_w$  and  $S_i$ , (b) bulk quantities, (c) freezing temperature histogram, and (d) initial CCN size distribution. The dashed line indicates the first freezing event.

### Ensemble simulations for lognormal CCN size spectra

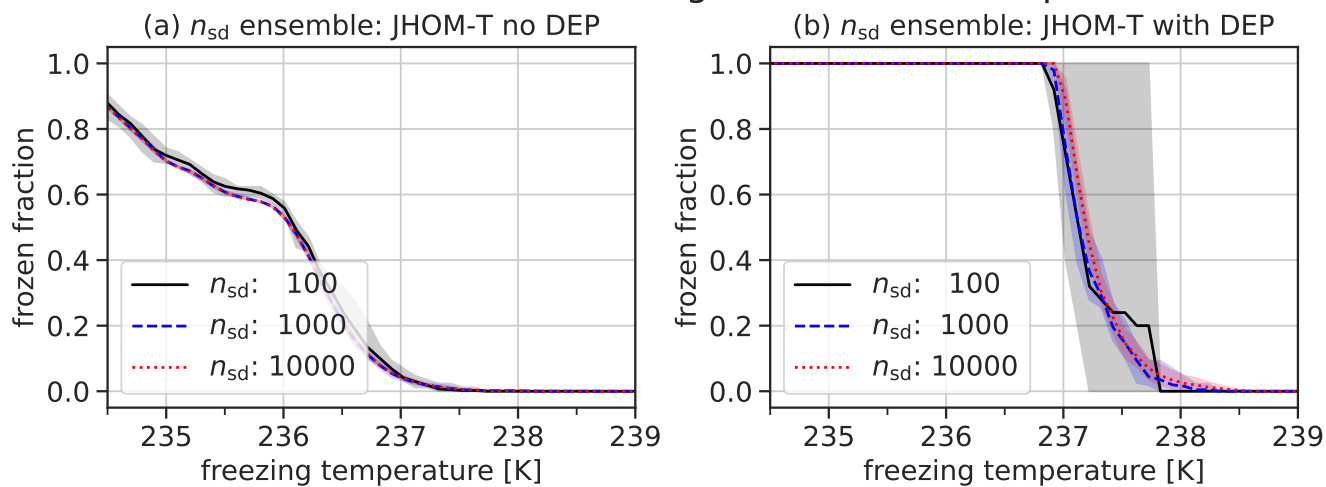

**Figure S3.**  $n_{sd}$  ensemble simulations using the JHOM-T nucleation rate without (a) and with (b) vapour deposition on ice. A lognormal CCN size distribution with  $\sigma = 2$  is used instead of a monodisperse spectrum.

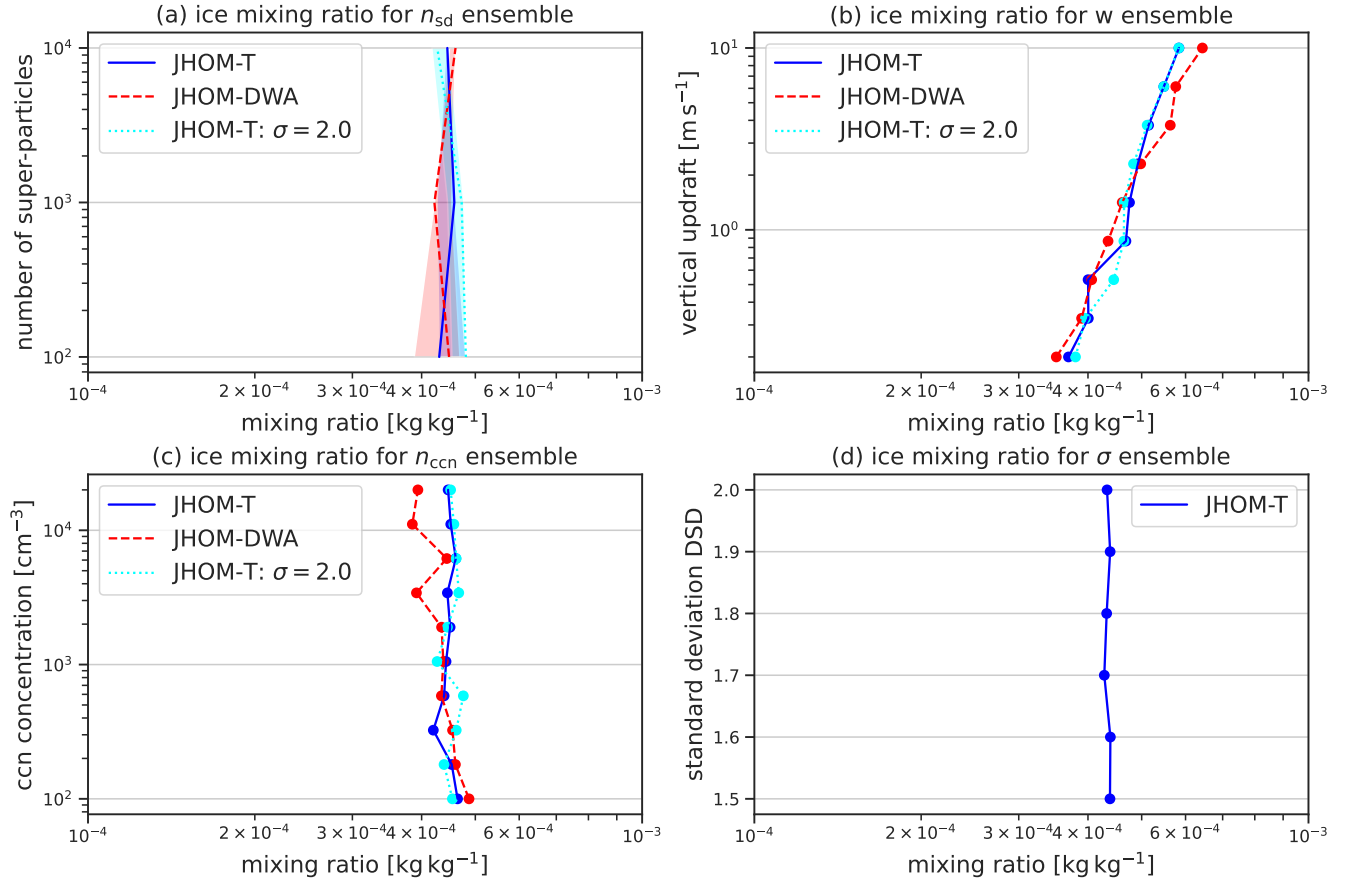

**Figure S4.** Bulk ice mixing ratio  $q_i$  for (a) the  $n_{sd}$  ensemble, (b) the  $w$  ensemble, (c) the  $n_{ccn}$  ensemble, and (d) the  $\sigma$  ensemble. Blue lines indicate simulations using the JHOM-T nucleation rate with monodisperse CCN spectra, teal lines the JHOM-T rate with lognormal CCN spectra, and red lines simulations using the JHOM-DWA rate.

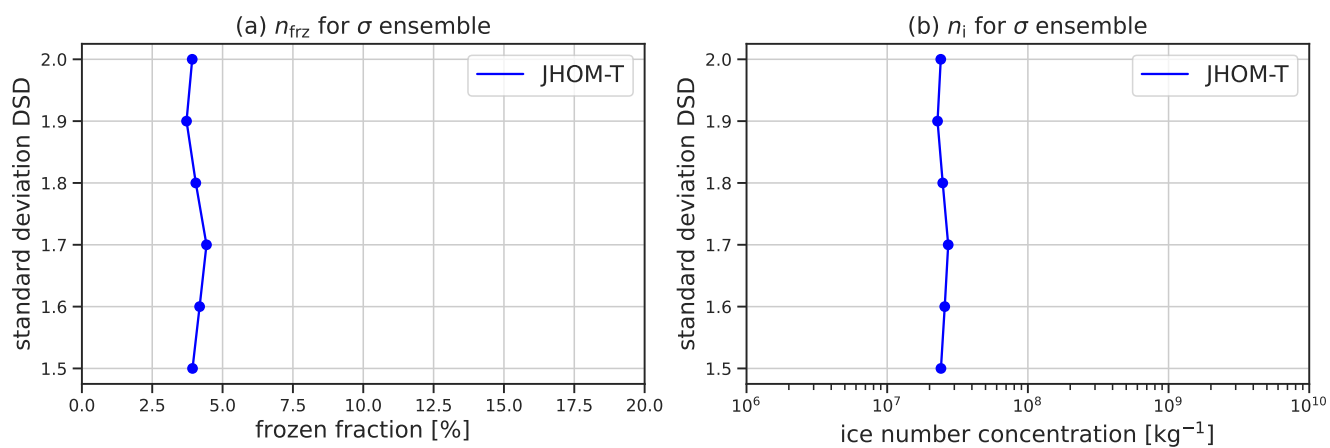

**Figure S5.** (a) frozen fraction  $n_{frz}$  and (b) ice number concentration  $n_i$  for the  $\sigma$  ensemble using the JHOM-T nucleation rate.
